# Supplementary material for: Construction of organic–inorganic hybrid composites derived from C3N5 incorporated with CeO2 for enhanced photocatalytic hydrogen evolution
Source: Royal Society of Chemistry journal article supplement (doi:10.1039/d4ya00476k), 2024-01-01
Supplement: d4ya00476k1.pdf [file d4ya00476k1.pdf]

-Supplementary information-

## Construction of organic inorganic hybrid composite derived from $C_3N_5$ incorporated with $CeO_2$ nanoparticles for the enhanced photocatalytic hydrogen evolution

Ashil Augustin<sup>a</sup>, Manova Santhosh Yesupatham<sup>a</sup>, M.D. Dhileepan<sup>a</sup>, Sanguk Son<sup>b</sup>,  
Ezhakudiyar Ravindran<sup>a</sup>, Bernaurdshaw Neppolian<sup>a</sup>, Hyoungil Kim<sup>b\*</sup>, and Karthikeyan  
Sekar<sup>a\*</sup>

<sup>a</sup>Department of Chemistry, Faculty of Engineering and Technology, SRM Institute of Science  
and Technology, Kattankulathur, 603203, India

<sup>b</sup>Department of Civil & Environmental Engineering, Yonsei University, Seoul 03722,  
Republic of Korea

Corresponding Author E-mail: [karthiks13@srmist.edu.in](mailto:karthiks13@srmist.edu.in); [hi.kim@yonsei.ac.kr](mailto:hi.kim@yonsei.ac.kr)

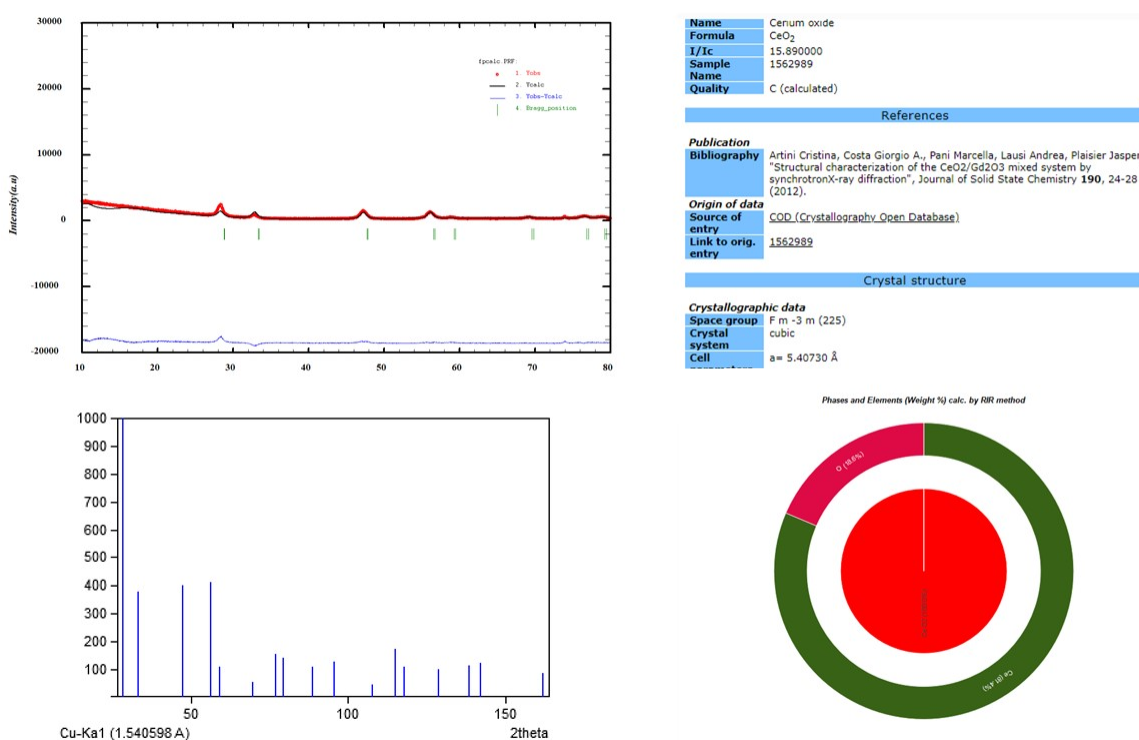

Figure S1. Rietveld analysis of  $CeO_2$  photocatalyst and composition of the  $CeO_2$  photocatalyst

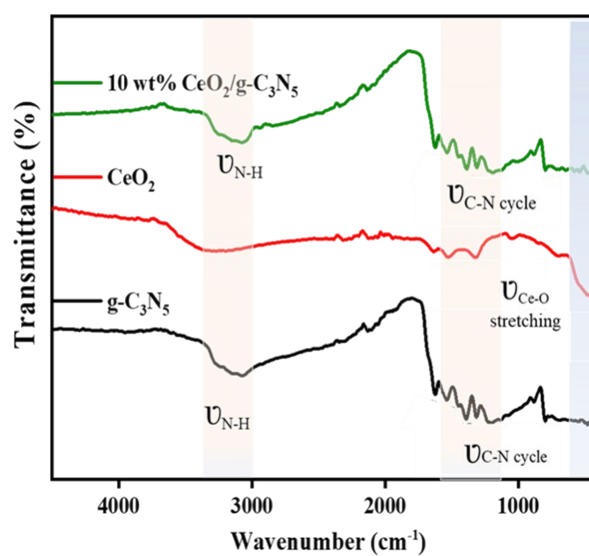

**Figure S2.** FTIR spectra of  $C_3N_5$ ,  $CeO_2$  and  $C_3N_5/CeO_2$  Composite.

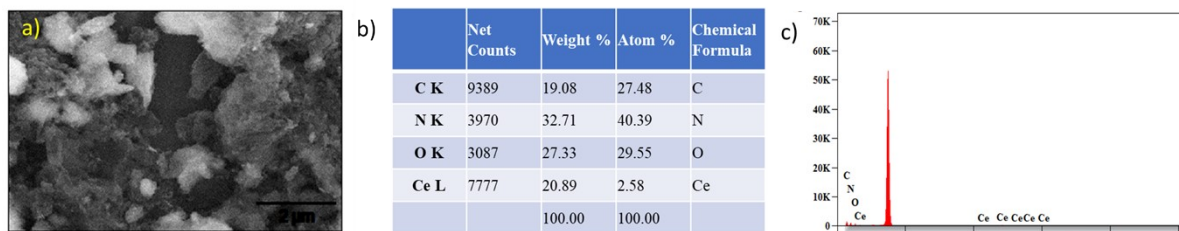

**Figure S3.** a) SEM image (b-c) respective energy-dispersive spectroscopy ratio of the  $CeO_2/C_3N_5$  composite (Ce, O, C, and N elements)

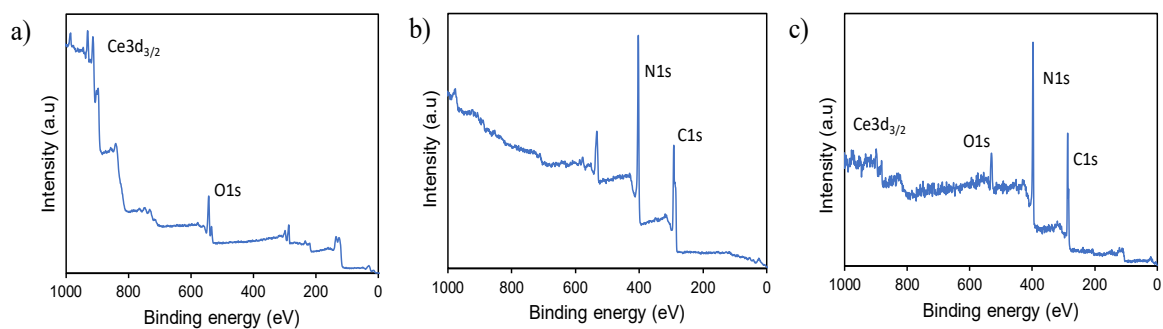

**Figure S4.** Survey XPS spectra of CeO<sub>2</sub>, C<sub>3</sub>N<sub>5</sub> and C<sub>3</sub>N<sub>5</sub>/CeO<sub>2</sub> Composite.

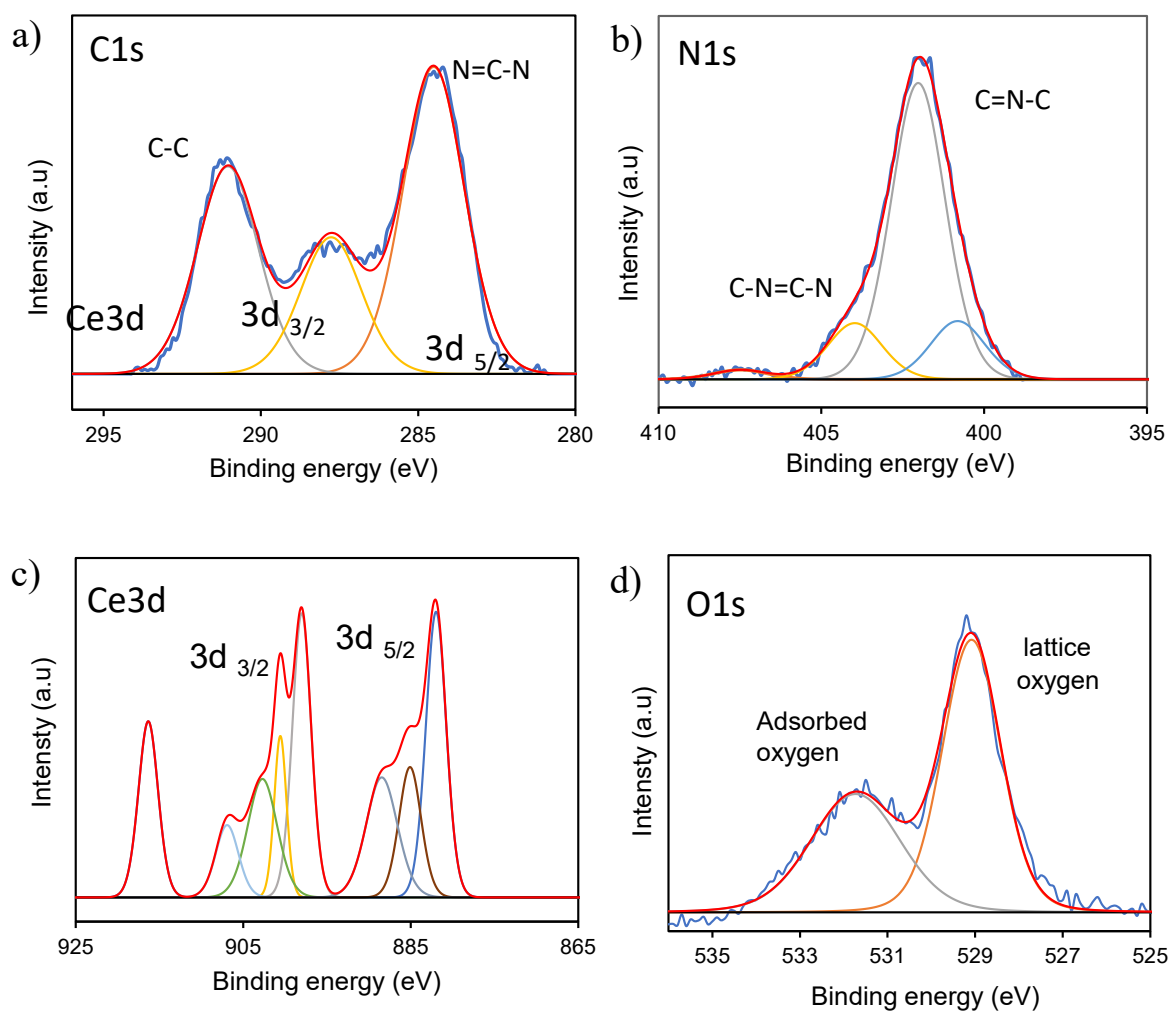

**Figure S5.** high resolution XPS of (a) C1s, (b) N 1s, (c) Ce 3d, (d) O 1s spectra of CeO<sub>2</sub> and C<sub>3</sub>N<sub>5</sub> pristine materials.

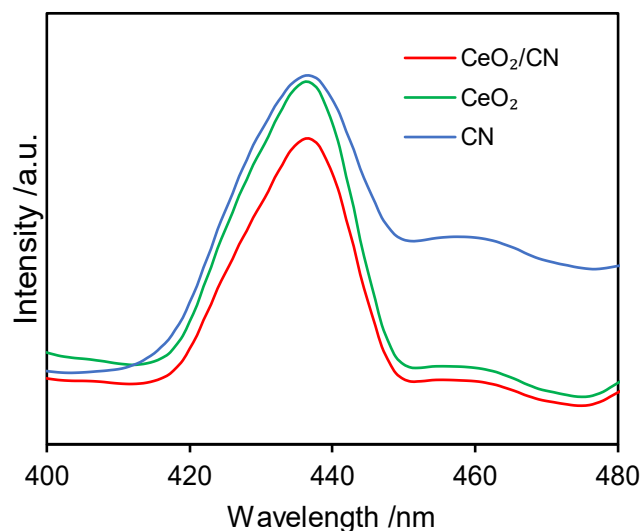

**Figure S6.** photoluminescence spectra of the samples.

The conduction band (CB) can be evaluated and converted to reversible hydrogen electrode (RHE) scale according to Nernst equation given as equation S1.

$$E_{\text{RHE}} = E_{\text{Ag/AgCl}} + E^0_{\text{Ag/AgCl}} + (0.059 \cdot \text{pH}) \quad (\text{S1})$$

where  $E_{\text{RHE}}$  is the converted potential vs. RHE,  $E^0_{\text{Ag/AgCl}}$  is 0.197 V,  $E_{\text{Ag/AgCl}}$  is the experimentally measured potential against Ag/AgCl reference and pH of  $\text{Na}_2\text{SO}_4$  electrolyte is 7 at 25 °C. Further, the valence band (VB) was calculated using Equation S2:

$$E_{\text{VB}} = E_{\text{g}} + E_{\text{CB}} \quad (\text{S2})$$

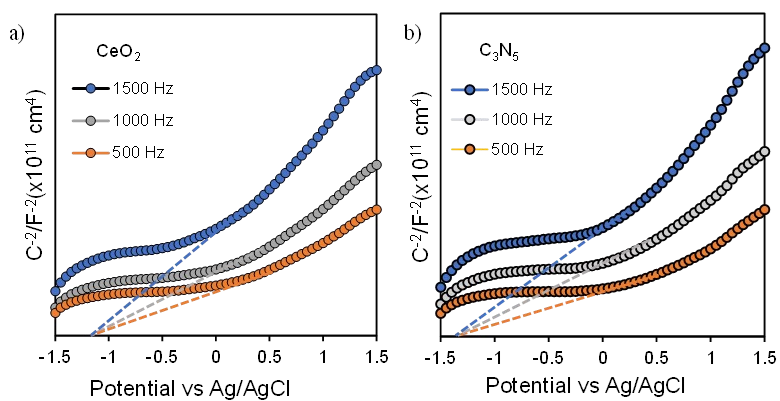

**Figure S7.** Mott–Schottky analysis of the samples a)  $\text{CeO}_2$  b)  $\text{C}_3\text{N}_5$

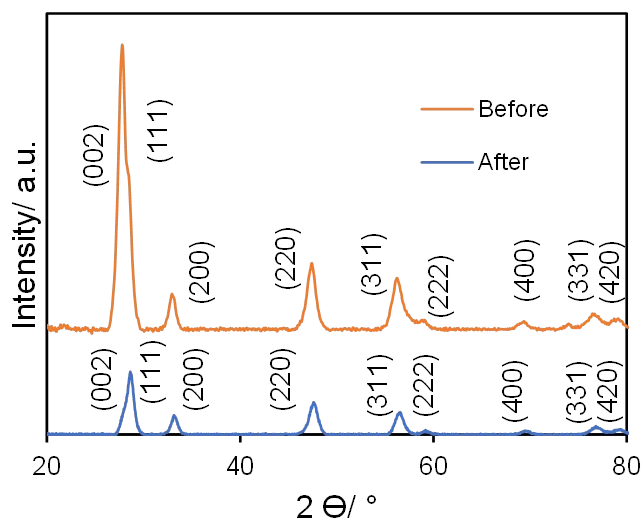

**Figure S8.** XRD analysis of  $\text{C}_3\text{N}_5/\text{CeO}_2$  composite after and before the reaction study.

**Table S1.** Physiochemical properties of the pristine catalyst used for photocatalytic application

| Catalyst                      | Crystallite size (nm) | Band gap (eV) | VB edge potential (eV) | CB edge potential (eV) |
|-------------------------------|-----------------------|---------------|------------------------|------------------------|
| CeO <sub>2</sub>              | 7.13 nm               | 2.5           | 2.03                   | -0.47                  |
| C <sub>3</sub> N <sub>5</sub> | 8.55 nm               | 1.9           | 1.09                   | -0.81                  |

**Table S2.** Elemental composition of C<sub>3</sub>N<sub>5</sub>, CeO<sub>2</sub> and C<sub>3</sub>N<sub>5</sub>/CeO<sub>2</sub> Composites

| Catalyst                                        | Elemental Composition (SEM EDAX) (%) |      |      |      | Elemental Composition (XPS) (%) |      |      |      |
|-------------------------------------------------|--------------------------------------|------|------|------|---------------------------------|------|------|------|
|                                                 | Ce                                   |      | O    |      | Ce                              |      | O    |      |
| CeO <sub>2</sub>                                | 69.7                                 |      | 30.3 |      | 81.4                            |      | 19.6 |      |
|                                                 | 29.1                                 |      | 70.9 |      | 39.4                            |      | 60.6 |      |
| C <sub>3</sub> N <sub>5</sub>                   | C                                    |      | N    |      | C                               |      | N    |      |
|                                                 | 29.1                                 |      | 70.9 |      | 39.4                            |      | 60.6 |      |
| CeO <sub>2</sub> /C <sub>3</sub> N <sub>5</sub> | Ce                                   | O    | C    | N    | Ce                              | O    | C    | N    |
|                                                 | 2.6                                  | 29.6 | 27.4 | 40.4 | 2.1                             | 20.6 | 35.6 | 41.7 |

**Table S3.** Activity comparison of some representative photocatalysts for photocatalytic hydrogen production.

| <b>SI No</b> | <b>Catalyst</b>                                            | <b>Scavenger</b>                             | <b>Co-Catalyst</b> | <b>Light Source</b> | <b>Hydrogen evolution rate (<math>\mu\text{mol/g/h}</math>)</b> | <b>Reference</b> |
|--------------|------------------------------------------------------------|----------------------------------------------|--------------------|---------------------|-----------------------------------------------------------------|------------------|
| 1            | S-doped $\text{C}_3\text{N}_5$                             | TEOA                                         | -                  | UV                  | 486                                                             | S <sup>[1]</sup> |
| 2            | Cr/N-STO                                                   | Methanol                                     | Pt                 | UV                  | 106.7                                                           | S <sup>[2]</sup> |
| 3            | NiO/ $\text{C}_3\text{N}_5$                                | TEOA                                         | -                  | UV                  | 357                                                             | S <sup>[3]</sup> |
| 4            | CdS/ $\text{C}_3\text{N}_5$                                | TEOA                                         | -                  | UV                  | 502.11                                                          | S <sup>[4]</sup> |
| 5            | $\text{C}_3\text{N}_4/\text{CeCO}_3\text{OH}/\text{CeO}_2$ | TEOA                                         | -                  | UV                  | 764                                                             | S <sup>[5]</sup> |
| 6            | $\text{CeO}_2/\text{MoS}_2$                                | $\text{Na}_2\text{SO}_3/\text{Na}_2\text{S}$ | -                  | UV                  | 112.5                                                           | S <sup>[6]</sup> |
| 7            | $\text{CeO}_2/\text{MXene}$                                | TEOA                                         | -                  | UV                  | 454.32                                                          | S <sup>[7]</sup> |
| 8            | Rh- $\text{TiO}_2$ - $\text{CeO}_2$                        | Methanol                                     | -                  | UV                  | 48.3                                                            | S <sup>[8]</sup> |
| 9            | NR- $\text{CeO}_2/\text{CdS}$                              | Lactic Acid                                  | -                  | Visible             | 444                                                             | S <sup>[9]</sup> |
| 10           | $\text{CeO}_2/\text{C}_3\text{N}_5$                        | Methanol                                     | -                  | Visible             | 1256                                                            | <b>This Work</b> |

## References

1. Guan, X.; Fawaz, M.; Sarkar, R.; Lin, C.-H.; Li, Z.; Lei, Z.; Nithinraj, P. D.; Kumar, P.; Zhang, X.; Yang, J.-H. J. J. o. M. C. A., S-doped C<sub>3</sub>N<sub>5</sub> derived from thiadiazole for efficient photocatalytic hydrogen evolution. *Journal of Materials Chemistry A* **2023**, *11* (24), 12837-12845.
2. Yu, H.; Ouyang, S.; Yan, S.; Li, Z.; Yu, T.; Zou, Z. J. J. o. M. C., Sol-gel hydrothermal synthesis of visible-light-driven Cr-doped SrTiO<sub>3</sub> for efficient hydrogen production. *Journal of Materials Chemistry* **2011**, *21* (30), 11347-11351.
3. LIU, M.-y.; WANG, J.-y.; Lian, D.; Xian, L.; ZHANG, L. J. J. o. F. C.; Technology, Nickel oxide modified C<sub>3</sub>N<sub>5</sub> photocatalyst for enhanced hydrogen evolution performance. *Journal of Fuel Chemistry* **2022**, *50* (2), 243-249.
4. Wang, B.; Qiao, H.; Guan, P.; Yang, B.; Liu, B. J. C. I., Fabrication of CdS/C<sub>3</sub>N<sub>5</sub> photocatalyst for enhanced H<sub>2</sub> production. *Composite Interfaces* **2023**, *30* (2), 147-161.
5. Tong, R.; Sun, Z.; Zhong, X.; Wang, X.; Xu, J.; Yang, Y.; Xu, B.; Wang, S.; Pan, H. J. C., Enhancement of visible-light photocatalytic hydrogen production by CeCO<sub>3</sub>OH in g-C<sub>3</sub>N<sub>4</sub>/CeO<sub>2</sub> system. *ChemCatChem* **2019**, *11* (3), 1069-1075.
6. Yadav, A. A.; Hunge, Y. M.; Kang, S.-W. J. C., Visible light-responsive CeO<sub>2</sub>/MoS<sub>2</sub> composite for photocatalytic hydrogen production. *Catalysts* **2022**, *12* (10), 1185.
7. Zhu, H.; Fu, X.; Zhou, Z. J. A. o., 3D/2D heterojunction of CeO<sub>2</sub>/ultrathin MXene nanosheets for photocatalytic hydrogen production. *omega* **2022**, *7* (25), 21684-21693.
8. Hong, J.-W. J. C., Development of visible-light-driven Rh-TiO<sub>2</sub>-CeO<sub>2</sub> hybrid photocatalysts for hydrogen production. *Catalysts* **2021**, *11* (7), 848.
9. Liu, Z.; Zhuang, Y.; Dong, L.; Mu, H.; Li, D.; Zhang, F.; Xu, H.; Xie, H. J. A. A. E. M., Enhancement mechanism of photocatalytic hydrogen production activity of CeO<sub>2</sub>/CdS by morphology regulation. *Applied Energy Materials* **2023**, *6* (14), 7722-7736.
